# Supplementary material for: Lingguizhugan decoction attenuates doxorubicin-induced heart failure in rats by improving TT-SR microstructural remodeling
Source: PubMed Central journal article supplement (PMC6907350; doi:10.1186/s12906-019-2771-6), 2019-12-11
Supplement: 12906_2019_2771_MOESM1_ESM.pdf [file 12906_2019_2771_MOESM1_ESM.pdf]

Supplementary figure 1

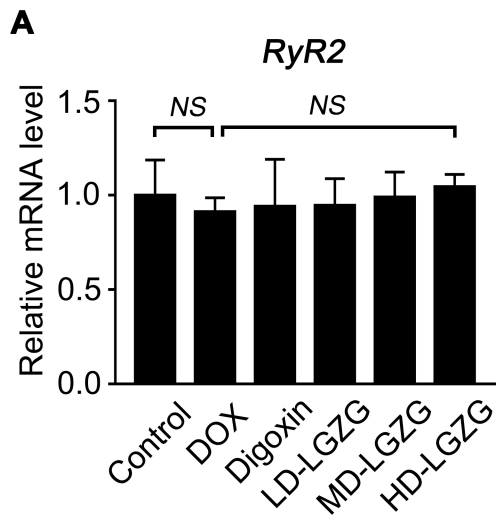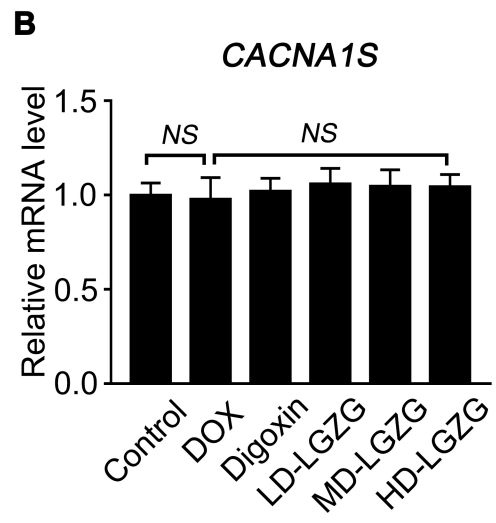

Supplementray figure 2

A

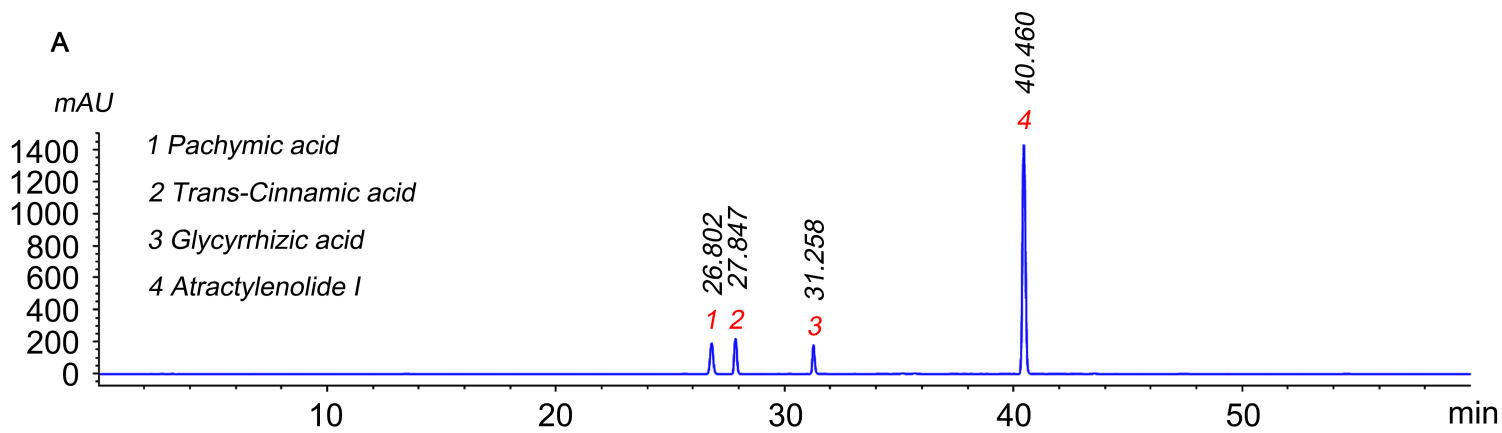

B

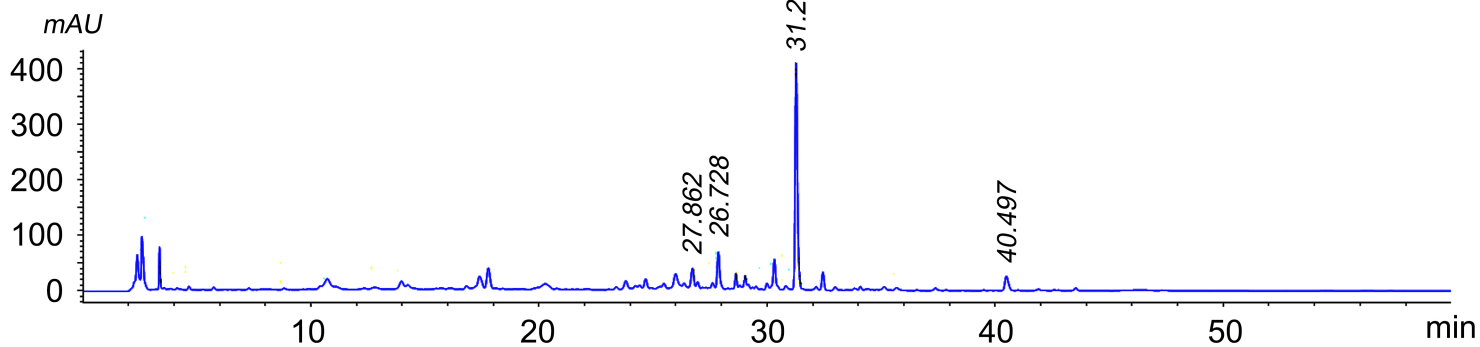

**Supplementary Table 1. Primer sets used for real-time PCR.**

| <b>Gene</b> | <b>Sense Primer (5' - 3')</b> | <b>Antisense Primer (5' - 3')</b> |
|-------------|-------------------------------|-----------------------------------|
| RyR2        | GGCTTCTTCCGCATTGTCTC          | TCTCCTCGCACCTCATCCT               |
| CACNA1S     | ACAACCAGTCGGAACAGATGA         | TCGGAACAGGCGGAAGAAG               |
| GAPDH       | GGCAAGTTCAACGGCACA            | TCTCGCTCCTGGAAGATGG               |



|                |         | Pixels of bot |                |                     |
|----------------|---------|---------------|----------------|---------------------|
|                |         | JP2           | $\beta$ -actin | JP2: $\beta$ -actin |
| <b>band1-1</b> | CON     | 87606         | 97111          | 0.902122314         |
|                | MODEL   | 53217         | 104395         | 0.509765793         |
|                | DIGOXIN | 72304         | 105856         | 0.683041112         |
|                | LD-LGZG | 49638         | 94223          | 0.526814048         |
|                | MD-LGZG | 52907         | 102387         | 0.516735523         |
|                | HD-LGZG | 72095         | 82797          | 0.870744109         |
| <b>band1-2</b> | CON     | 72022         | 83751          | 0.859953911         |
|                | MODEL   | 40060         | 89628          | 0.44695854          |
|                | DIGOXIN | 61211         | 84490          | 0.724476269         |
|                | LD-LGZG | 50190         | 89488          | 0.560857322         |
|                | MD-LGZG | 68388         | 84793          | 0.806528841         |
|                | HD-LGZG | 66992         | 89532          | 0.748246437         |
| <b>band2-1</b> |         | JP2-2         | actin2         |                     |
|                | CON     | 82415         | 79672          | 1.034428657         |
|                | MODEL   | 30152         | 85325          | 0.35337826          |
|                | DIGOXIN | 69219         | 79034          | 0.875812941         |
|                | LD-LGZG | 38050         | 87605          | 0.43433594          |
|                | MD-LGZG | 38811         | 84517          | 0.45920939          |
| HD-LGZG        | 60946   | 72442         | 0.841307529    |                     |
| <b>band2-2</b> | CON     | 65666         | 78114          | 0.840643163         |
|                | MODEL   | 41697         | 92854          | 0.449059814         |
|                | DIGOXIN | 45139         | 79732          | 0.566134049         |
|                | LD-LGZG | 37155         | 78410          | 0.473855376         |
|                | MD-LGZG | 25121         | 76290          | 0.329282999         |
|                | HD-LGZG | 45714         | 72503          | 0.630511841         |

**Supplementary materials of RT-PCR raw data of U6 and miR-24**

| Groups    | Ct of gene |        | Ct average |        | $\Delta CT = CT_{miR-24} - Ct_{u6}$ | $\Delta\Delta CT$ | $2^{-\Delta\Delta CT}$ |
|-----------|------------|--------|------------|--------|-------------------------------------|-------------------|------------------------|
|           | U6         | miR-24 | U6         | miR-24 |                                     |                   |                        |
| control-1 | 15.62      | 21.45  |            |        |                                     |                   |                        |
|           | 15.61      | 21.45  | 15.62      | 21.50  | 5.88                                | -0.23             | 1.17                   |
|           | 15.64      | 21.60  |            |        |                                     |                   |                        |
| control-2 | 15.37      | 21.51  |            |        |                                     |                   |                        |
|           | 15.46      | 21.37  | 15.48      | 21.37  | 5.89                                | -0.22             | 1.16                   |
|           | 15.62      | 21.24  |            |        |                                     |                   |                        |
| control-3 | 15.80      | 22.06  |            |        |                                     |                   |                        |
|           | 15.83      | 22.01  | 15.88      | 22.04  | 6.16                                | 0.05              | 0.96                   |
|           | 16.00      | 22.04  |            |        |                                     |                   |                        |
| control-4 | 16.42      | 22.72  |            |        |                                     |                   |                        |
|           | 16.52      | 22.59  | 16.50      | 22.63  | 6.13                                | 0.02              | 0.99                   |
|           | 16.57      | 22.58  |            |        |                                     |                   |                        |
| control-5 | 16.08      | 21.55  |            |        |                                     |                   |                        |
|           | 16.16      | 21.68  | 16.10      | 21.53  | 5.43                                | -0.67             | 1.59                   |
|           | 16.05      | 21.36  |            |        |                                     |                   |                        |
| control-6 | 15.88      | 22.24  |            |        |                                     |                   |                        |
|           | 15.76      | 22.24  | 15.69      | 22.34  | 6.65                                | 0.54              | 0.69                   |
|           | 15.42      | 22.53  |            |        |                                     |                   |                        |

|           |       |       |       |       |      |      |       |      |
|-----------|-------|-------|-------|-------|------|------|-------|------|
| control-7 | 15.54 | 21.68 |       |       |      |      |       |      |
|           | 15.27 | 21.20 | 15.33 | 21.38 | 6.05 |      | -0.05 | 1.04 |
|           | 15.17 | 21.26 |       |       |      |      |       |      |
| control-8 | 15.06 | 21.72 |       |       |      |      |       |      |
|           | 14.97 | 21.71 | 15.05 | 21.71 | 6.66 | 6.11 | 0.55  | 0.68 |
|           | 15.11 | 21.69 |       |       |      |      |       |      |
| DOX-1     | 17.06 | 21.36 |       |       |      |      |       |      |
|           | 16.85 | 21.03 | 16.72 | 21.12 | 4.40 |      | -1.71 | 3.26 |
|           | 16.24 | 20.96 |       |       |      |      |       |      |
| DOX-2     | 16.04 | 20.73 |       |       |      |      |       |      |
|           | 15.88 | 20.63 | 15.83 | 20.68 | 4.85 |      | -1.26 | 2.39 |
|           | 15.56 | 20.67 |       |       |      |      |       |      |
| DOX-3     | 17.42 | 21.02 |       |       |      |      |       |      |
|           | 17.34 | 20.72 | 17.26 | 20.81 | 3.55 |      | -2.55 | 5.87 |
|           | 17.01 | 20.69 |       |       |      |      |       |      |
| DOX-4     | 16.97 | 21.08 |       |       |      |      |       |      |
|           | 16.87 | 20.97 | 16.95 | 21.04 | 4.08 |      | -2.02 | 4.06 |
|           | 17.02 | 21.06 |       |       |      |      |       |      |
| DOX-5     | 17.15 | 21.75 |       |       |      |      |       |      |
|           | 17.08 | 21.72 | 17.09 | 21.77 | 4.67 |      | -1.43 | 2.70 |
|           | 17.05 | 21.83 |       |       |      |      |       |      |
| DOX-6     | 15.59 | 20.45 |       |       |      |      |       |      |



|               |       |       |       |       |      |  |       |      |
|---------------|-------|-------|-------|-------|------|--|-------|------|
|               | 15.87 | 20.46 | 15.76 | 20.37 | 4.62 |  | -1.49 | 2.81 |
|               | 15.81 | 20.21 |       |       |      |  |       |      |
| DOX-7         | 16.99 | 20.78 |       |       |      |  |       |      |
|               | 17.04 | 20.79 | 16.96 | 20.92 | 3.96 |  | -2.15 | 4.44 |
|               | 16.86 | 21.19 |       |       |      |  |       |      |
| DOX-8         | 18.90 | 23.85 |       |       |      |  |       |      |
|               | 18.88 | 23.67 | 18.87 | 23.69 | 4.82 |  | -1.28 | 2.43 |
|               | 18.82 | 23.55 |       |       |      |  |       |      |
| Digoxi<br>n-1 | 14.94 | 22.06 |       |       |      |  |       |      |
|               | 14.73 | 21.97 | 14.81 | 21.94 | 7.13 |  | 1.02  | 0.49 |
|               | 14.77 | 21.80 |       |       |      |  |       |      |
| Digoxi<br>n-2 | 15.21 | 21.66 |       |       |      |  |       |      |
|               | 15.15 | 21.54 | 15.23 | 21.62 | 6.39 |  | 0.29  | 0.82 |
|               | 15.32 | 21.66 |       |       |      |  |       |      |
| Digoxi<br>n-3 | 14.11 | 20.91 |       |       |      |  |       |      |
|               | 13.99 | 20.80 | 14.04 | 20.79 | 6.75 |  | 0.64  | 0.64 |
|               | 14.03 | 20.66 |       |       |      |  |       |      |
| Digoxi<br>n-4 | 15.02 | 19.74 |       |       |      |  |       |      |
|               | 14.92 | 19.64 | 14.89 | 19.63 | 4.74 |  | -1.37 | 2.58 |
|               | 14.73 | 19.51 |       |       |      |  |       |      |
| Digoxi<br>n-5 | 15.32 | 21.73 |       |       |      |  |       |      |
|               | 15.51 | 21.56 | 15.5  | 21.56 | 5.98 |  | -0.13 | 1.09 |

|                   |       |       |           |       |      |  |       |      |
|-------------------|-------|-------|-----------|-------|------|--|-------|------|
|                   |       |       | 8         |       |      |  |       |      |
|                   | 15.91 | 21.39 |           |       |      |  |       |      |
| Digoxi<br>n-6     | 15.49 | 21.33 |           |       |      |  |       |      |
|                   | 15.21 | 21.15 | 15.3<br>1 | 21.18 | 5.87 |  | -0.23 | 1.18 |
|                   | 15.23 | 21.07 |           |       |      |  |       |      |
| Digoxi<br>n-7     | 15.41 | 20.35 |           |       |      |  |       |      |
|                   | 15.05 | 20.02 | 15.2<br>0 | 20.14 | 4.95 |  | -1.16 | 2.23 |
|                   | 15.13 | 20.06 |           |       |      |  |       |      |
| Digoxi<br>n-8     | 15.71 | 21.52 |           |       |      |  |       |      |
|                   | 15.51 | 21.57 | 15.5<br>3 | 21.59 | 6.07 |  | -0.04 | 1.03 |
|                   | 15.36 | 21.69 |           |       |      |  |       |      |
| LD-<br>LGZG-<br>1 | 17.13 | 23.02 |           |       |      |  |       |      |
|                   | 17.31 | 23.07 | 17.2<br>2 | 23.03 | 5.81 |  | -0.30 | 1.23 |
|                   | 17.23 | 23.00 |           |       |      |  |       |      |
| LD-<br>LGZG-<br>2 | 17.12 | 23.19 |           |       |      |  |       |      |
|                   | 17.25 | 23.10 | 17.1<br>8 | 23.17 | 5.99 |  | -0.12 | 1.08 |
|                   | 17.17 | 23.22 |           |       |      |  |       |      |
| LD-<br>LGZG-<br>3 | 16.67 | 21.97 |           |       |      |  |       |      |
|                   | 16.79 | 21.90 | 16.7<br>6 | 21.88 | 5.12 |  | -0.99 | 1.98 |
|                   | 16.82 | 21.77 |           |       |      |  |       |      |
| LD-<br>LGZG-<br>4 | 15.46 | 21.48 |           |       |      |  |       |      |
|                   | 15.78 | 21.68 | 15.7<br>2 | 21.59 | 5.87 |  | -0.23 | 1.18 |

|           |       |       |       |       |      |  |       |      |
|-----------|-------|-------|-------|-------|------|--|-------|------|
|           | 15.91 | 21.61 |       |       |      |  |       |      |
| LD-LGZG-5 | 15.92 | 22.47 |       |       |      |  |       |      |
|           | 16.36 | 22.62 | 16.15 | 22.51 | 6.37 |  | 0.26  | 0.83 |
|           | 16.16 | 22.45 |       |       |      |  |       |      |
| LD-LGZG-6 | 17.29 | 22.18 |       |       |      |  |       |      |
|           | 17.01 | 21.88 | 17.16 | 21.99 | 4.83 |  | -1.28 | 2.42 |
|           | 17.19 | 21.92 |       |       |      |  |       |      |
| LD-LGZG-7 | 17.16 | 21.60 |       |       |      |  |       |      |
|           | 16.92 | 21.12 | 17.08 | 21.28 | 4.20 |  | -1.91 | 3.76 |
|           | 17.17 | 21.12 |       |       |      |  |       |      |
| LD-LGZG-8 | 17.12 | 21.78 |       |       |      |  |       |      |
|           | 17.31 | 21.47 | 17.31 | 21.63 | 4.32 |  | -1.78 | 3.44 |
|           | 17.50 | 21.65 |       |       |      |  |       |      |
| MD-LGZG-1 | 17.05 | 23.24 |       |       |      |  |       |      |
|           | 17.04 | 23.08 | 16.86 | 23.04 | 6.18 |  | 0.07  | 0.95 |
|           | 16.49 | 22.80 |       |       |      |  |       |      |
| MD-LGZG-2 | 15.57 | 21.94 |       |       |      |  |       |      |
|           | 15.71 | 21.68 | 15.71 | 21.72 | 6.01 |  | -0.10 | 1.07 |
|           | 15.84 | 21.53 |       |       |      |  |       |      |
| MD-LGZG-3 | 16.32 | 22.04 |       |       |      |  |       |      |
|           | 16.31 | 21.97 | 16.23 | 21.96 | 5.73 |  | -0.38 | 1.30 |
|           | 16.06 | 21.86 |       |       |      |  |       |      |

|           |       |       |       |       |      |  |       |      |
|-----------|-------|-------|-------|-------|------|--|-------|------|
| MD-LGZG-4 | 15.81 | 20.57 |       |       |      |  |       |      |
|           | 15.89 | 20.53 | 15.81 | 20.61 | 4.80 |  | -1.31 | 2.48 |
|           | 15.74 | 20.73 |       |       |      |  |       |      |
| MD-LGZG-5 | 16.10 | 20.70 |       |       |      |  |       |      |
|           | 16.20 | 20.72 | 16.18 | 20.77 | 4.59 |  | -1.52 | 2.86 |
|           | 16.25 | 20.90 |       |       |      |  |       |      |
| MD-LGZG-6 | 15.42 | 20.66 |       |       |      |  |       |      |
|           | 15.54 | 20.87 | 15.58 | 20.84 | 5.26 |  | -0.84 | 1.79 |
|           | 15.78 | 21.00 |       |       |      |  |       |      |
| MD-LGZG-7 | 15.61 | 21.05 |       |       |      |  |       |      |
|           | 15.65 | 20.98 | 15.67 | 21.08 | 5.41 |  | -0.69 | 1.62 |
|           | 15.74 | 21.21 |       |       |      |  |       |      |
| MD-LGZG-8 | 15.12 | 21.08 |       |       |      |  |       |      |
|           | 15.32 | 21.06 | 15.28 | 21.01 | 5.73 |  | -0.37 | 1.29 |
|           | 15.40 | 20.90 |       |       |      |  |       |      |
| HD-LGZG-1 | 16.38 | 22.62 |       |       |      |  |       |      |
|           | 16.35 | 22.60 | 16.39 | 22.67 | 6.28 |  | 0.17  | 0.89 |
|           | 16.43 | 22.78 |       |       |      |  |       |      |
| HD-LGZG-2 | 15.05 | 20.53 |       |       |      |  |       |      |
|           | 15.15 | 20.40 | 15.11 | 20.50 | 5.39 |  | -0.72 | 1.64 |
|           | 15.12 | 20.56 |       |       |      |  |       |      |
| HD-       | 16.42 | 21.05 |       |       |      |  |       |      |

|           |       |       |       |       |      |  |       |      |
|-----------|-------|-------|-------|-------|------|--|-------|------|
| LGZG-3    | 16.53 | 20.94 | 16.54 | 21.04 | 4.50 |  | -1.61 | 3.04 |
|           | 16.66 | 21.12 |       |       |      |  |       |      |
| HD-LGZG-4 | 15.98 | 22.76 |       |       |      |  |       |      |
|           | 15.73 | 22.65 | 15.92 | 22.76 | 6.84 |  | 0.73  | 0.60 |
|           | 16.06 | 22.87 |       |       |      |  |       |      |
| HD-LGZG-5 | 16.76 | 22.21 |       |       |      |  |       |      |
|           | 16.52 | 22.07 | 16.75 | 22.23 | 5.48 |  | -0.62 | 1.54 |
|           | 16.96 | 22.41 |       |       |      |  |       |      |
| HD-LGZG-6 | 15.25 | 21.80 |       |       |      |  |       |      |
|           | 15.07 | 21.61 | 15.18 | 21.70 | 6.51 |  | 0.41  | 0.75 |
|           | 15.23 | 21.68 |       |       |      |  |       |      |
| HD-LGZG-7 | 16.84 | 22.92 |       |       |      |  |       |      |
|           | 16.94 | 22.92 | 16.87 | 22.94 | 6.07 |  | -0.04 | 1.03 |
|           | 16.83 | 22.97 |       |       |      |  |       |      |
| HD-LGZG-8 | 15.33 | 20.28 |       |       |      |  |       |      |
|           | 15.20 | 20.23 | 15.33 | 20.31 | 4.98 |  | -1.12 | 2.18 |
|           | 15.46 | 20.43 |       |       |      |  |       |      |

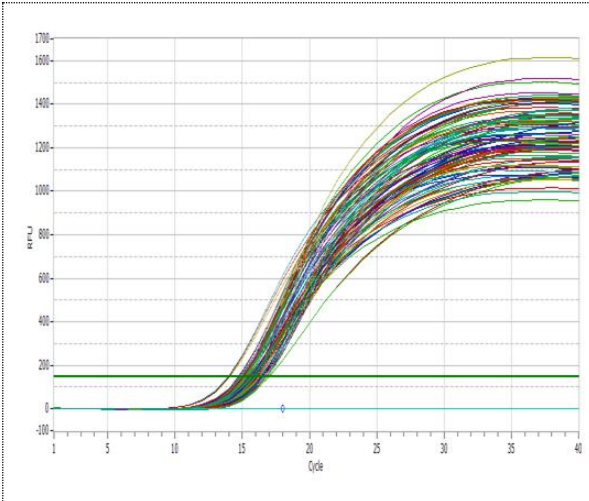

**Fig. 1-1 Amplification curve of U6 (1)**

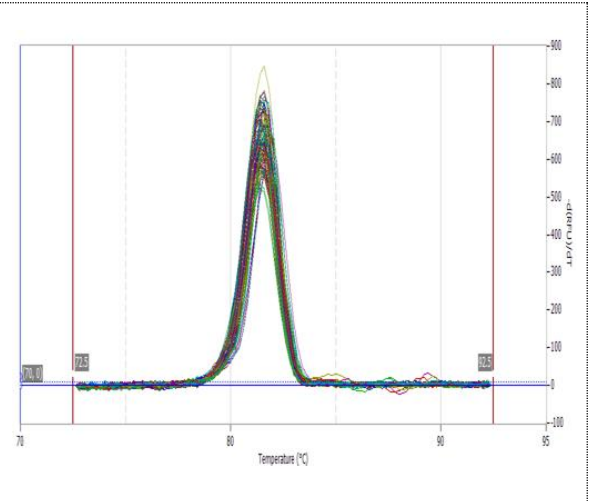

**Fig 1-2 Melting curve of U6 (1)**

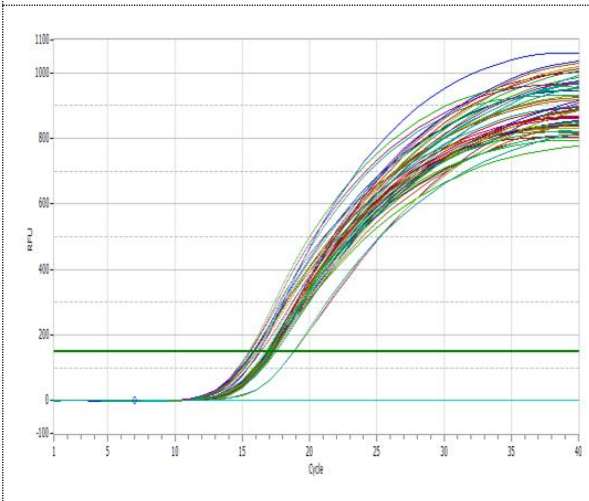

**Fig. 1-3 Amplification curve of U6 (2)**

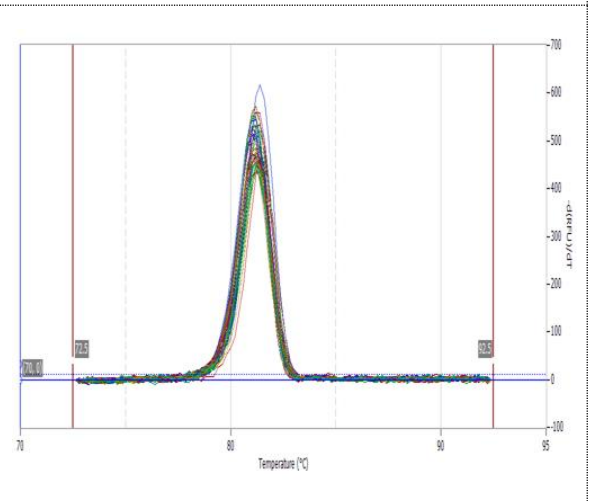

**Fig. 1-4 Melting curve of U6 (2)**

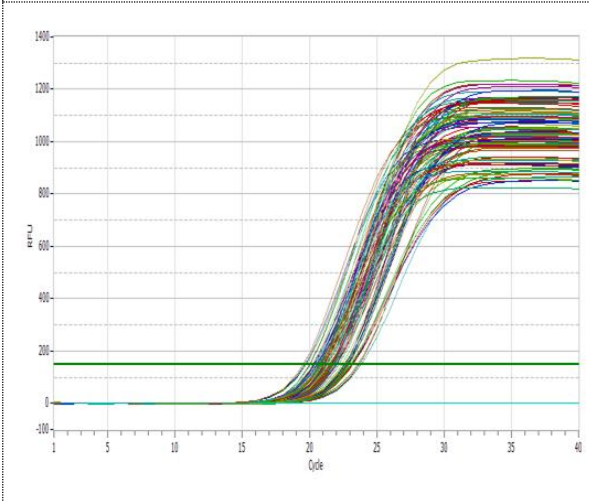

**Fig. 1-5 Amplification curve of miR-24 (1)**

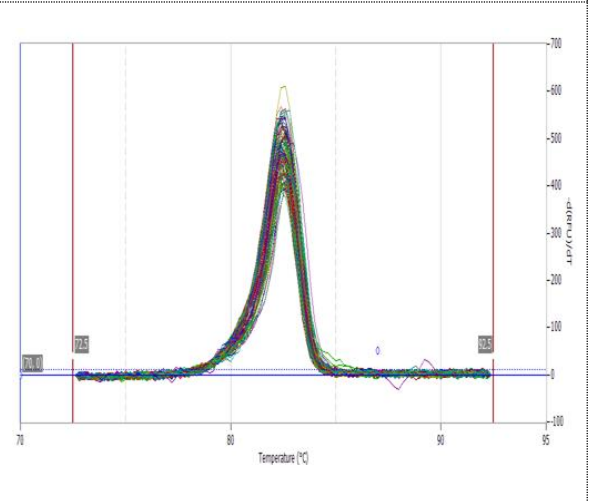

**Fig. 1-6 Melting curve of miR-24 (1)**

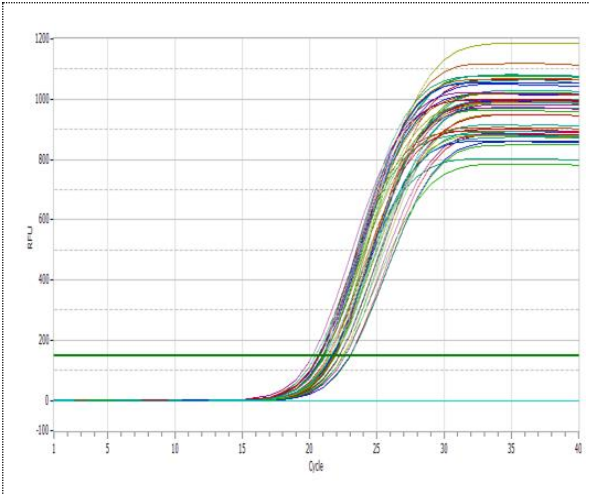

**Fig. 1-7 Amplification curve of miR-24 (2)**

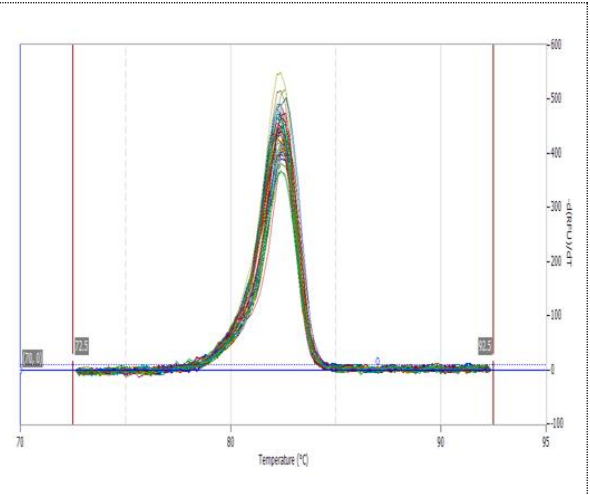

**Fig. 1-8 Melting curve of miR-24 (2)**
